# Supplementary material for: A Bayesian framework for the analysis of systems biology models of the brain
Source: PLOS journal article supplement (doi:10.1371/journal.pcbi.1006631), 2019-04-26
Supplement: S13 (10.1371/journal.pcbi.1006631.s013) [file journal.pcbi.1006631.s013]

**S10 Fig Comparison of marginal posterior and prior distributions for the simulated impaired data.**

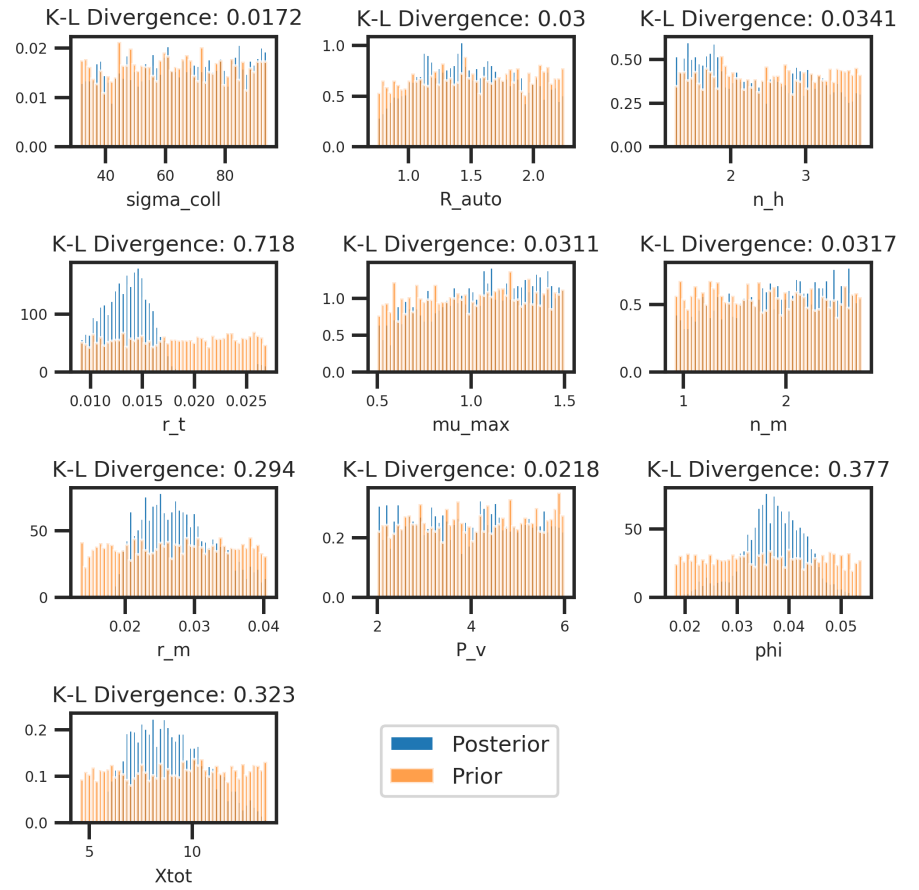

**Comparison of marginal posterior and prior distributions for each parameter.** A clearer comparison is made here between the marginal prior and posterior distributions for each fitted parameter. The Kullback–Leibler divergence is shown for each.
